# Supplementary material
Source: PubMed Central journal article supplement (PMC2967771)
Supplement: NIHMS206246-supplement-01.pdf [file NIHMS206246-supplement-01.pdf]

# checkCIF/PLATON report (publication check)

No syntax errors found.  
Please wait while processing ....

[CIF dictionary](#)  
[Interpreting this report](#)

## Datablock: 1

---

|                 |                                              |                    |
|-----------------|----------------------------------------------|--------------------|
| Bond precision: | C-C = 0.0104 Å                               | Wavelength=0.71073 |
| Cell:           | a=8.180(3)      b=18.411(3)      c=14.435(3) |                    |
|                 | alpha=90      beta=92.79(2)      gamma=90    |                    |
| Temperature:    | 298 K                                        |                    |

  

|                        | Calculated            | Reported          |
|------------------------|-----------------------|-------------------|
| Volume                 | 2171.4(10)            | 2171.3(10)        |
| Space group            | P 21/n                | P 1 21/n 1        |
| Hall group             | -P 2yn                | -P 2yn            |
| Moiety formula         | C8 H20 N, C8 N4 Ni S4 | C16 H20 N5 NI1 S4 |
| Sum formula            | C16 H20 N5 Ni S4      | C16 H20 N5 Ni1 S4 |
| Mr                     | 469.34                | 469.34            |
| Dx, g cm <sup>-3</sup> | 1.436                 | 1.436             |
| Z                      | 4                     | 4                 |
| Mu (mm <sup>-1</sup> ) | 1.288                 | 1.288             |
| F000                   | 972.0                 | 972.0             |
| F000'                  | 975.49                |                   |
| h,k,lmax               | 10,23,18              | 9,23,18           |
| Nref                   | 4987                  | 4092              |
| Tmin,Tmax              | 0.655,0.824           | 0.650,0.820       |
| Tmin'                  | 0.591                 |                   |

Correction method= PSI-SCAN

Data completeness= 0.821      Theta(max)= 27.504

R(reflections)= 0.0476( 2011)      wR2(reflections)= 0.1176( 2011)

S = 1.024      Npar= 235

---

The following ALERTS were generated. Each ALERT has the format  
**test-name\_ALERT\_alert-type\_alert-level**.  
Click on the hyperlinks for more details of the test.

### ● Alert level A

[PLAT022\\_ALERT\\_3\\_A](#) Ratio Unique / Expected Reflections too Low .... 0.82

**Author Response: This is an old dataset collected on four-circle diffractometer with pin-point detector. Several missing hkl indexes were not collected because beam stopper interference.**

[PLAT940\\_ALERT\\_3\\_A](#) F\*\*2 Refinement with I .GT. n \* Sigma(I) only .. ?

**Author Response: This is an old dataset collected on four-circle diffractometer with pin-point detector. Following suggestions for non-CCD datasets, refinement was conducted using I > 2sigma conditions.**

### ● Alert level C

[REFNR01\\_ALERT\\_3\\_C](#) Ratio of reflections to parameters is < 10 for a centrosymmetric structure

|                                 |        |
|---------------------------------|--------|
| sine(theta)/lambda              | 0.6498 |
| Proportion of unique data used  | 0.4914 |
| Ratio reflections to parameters | 8.5574 |

[PLAT026\\_ALERT\\_3\\_C](#) Ratio Observed / Unique Reflections too Low .... 49 Perc.

[PLAT029\\_ALERT\\_3\\_C](#) \_diffn\_measured\_fraction\_theta\_full Low ..... 0.98

[PLAT088\\_ALERT\\_3\\_C](#) Poor Data / Parameter Ratio ..... 8.56

[PLAT341\\_ALERT\\_3\\_C](#) Low Bond Precision on C-C Bonds (x 1000) Ang .. 10

[PLAT371\\_ALERT\\_2\\_C](#) Long C(sp2)-C(sp1) Bond C1 - C3 ... 1.43 Ang.

[PLAT371\\_ALERT\\_2\\_C](#) Long C(sp2)-C(sp1) Bond C2 - C4 ... 1.45 Ang.

[PLAT371\\_ALERT\\_2\\_C](#) Long C(sp2)-C(sp1) Bond C5 - C7 ... 1.44 Ang.

|                                   |                                                          |           |
|-----------------------------------|----------------------------------------------------------|-----------|
| <a href="#">PLAT371_ALERT_2_C</a> | Long C(sp2)-C(sp1) Bond C6 - C8 ...                      | 1.44 Ang. |
| <a href="#">PLAT042_ALERT_1_C</a> | Calc. and Reported MoietyFormula Strings Differ          | ?         |
| <a href="#">PLAT153_ALERT_1_C</a> | The su's on the Cell Axes are Equal (x 100000)           | 300 Ang.  |
| <a href="#">PLAT234_ALERT_4_C</a> | Large Hirshfeld Difference N5 -- C11 ..                  | 0.15 Ang. |
| <a href="#">PLAT234_ALERT_4_C</a> | Large Hirshfeld Difference C13 -- C14 ..                 | 0.18 Ang. |
| <a href="#">PLAT243_ALERT_4_C</a> | High 'Solvent' Ueq as Compared to Neighbors of C13       |           |
| <a href="#">PLAT244_ALERT_4_C</a> | Low 'Solvent' Ueq as Compared to Neighbors of N5         |           |
| <a href="#">PLAT790_ALERT_4_C</a> | Centre of Gravity not Within Unit Cell: Resd. # C8 H20 N | 1         |

---

### Alert level G

|                                   |                                                 |       |
|-----------------------------------|-------------------------------------------------|-------|
| <a href="#">PLAT128_ALERT_4_G</a> | Non-standard setting of Space-group P21/c ....  | P21/n |
| <a href="#">PLAT808_ALERT_5_G</a> | No Parsable SHELXL style Weighting Scheme Found | !     |

2 **ALERT level A** = In general: serious problem

0 **ALERT level B** = Potentially serious problem

16 **ALERT level C** = Check and explain

2 **ALERT level G** = General alerts; check

2 ALERT type 1 CIF construction/syntax error, inconsistent or missing data  
 4 ALERT type 2 Indicator that the structure model may be wrong or deficient  
 7 ALERT type 3 Indicator that the structure quality may be low  
 6 ALERT type 4 Improvement, methodology, query or suggestion  
 1 ALERT type 5 Informative message, check

---

### Publication of your CIF

You should always attempt to resolve as many as possible of the alerts in all categories. Often the minor alerts point to easily fixed oversights, errors and omissions in your CIF or refinement strategy, so attention to these fine details can be worthwhile. In order to resolve some of the more serious problems it may be necessary to carry out additional measurements or structure refinements. However, the nature of your study may justify the reported deviations from the submission requirements of the journal and these should be commented upon in the discussion or experimental section of a paper - after all, they might represent an interesting feature.

If you wish to submit your CIF for publication in Acta Crystallographica Section C or E, you should upload your CIF via [the web](#). If your CIF is to form part of a submission to another IUCr journal, you will be asked, either during electronic [submission](#) or by the Co-editor handling your paper, to upload your CIF via our web site.

---

PLATON version of 13/08/2009; check.def file version of 12/08/2009

### Datablock 1 - ellipsoid plot

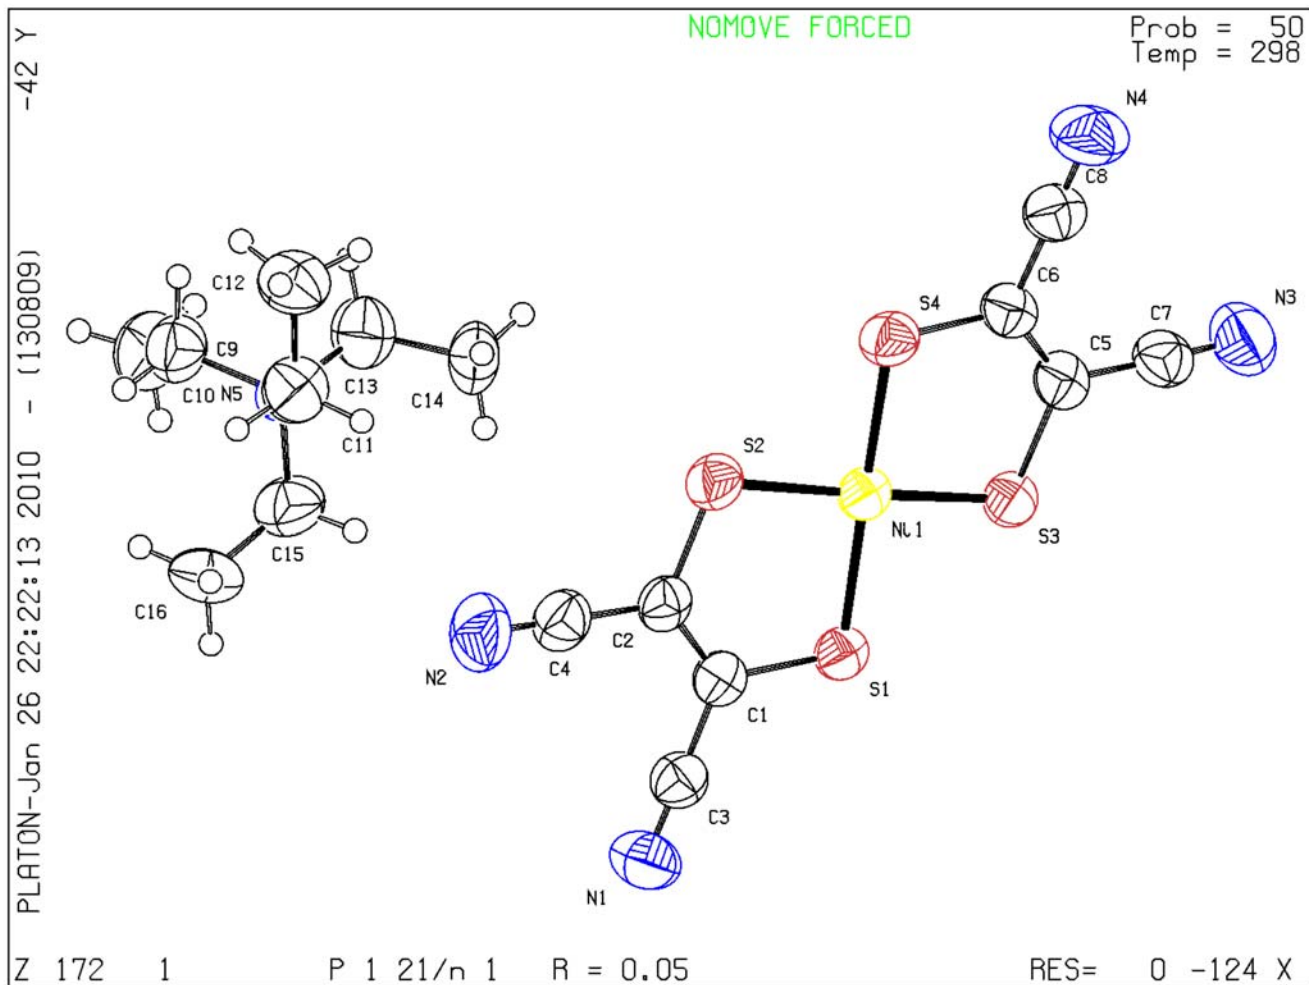

[Download CIF editor \(pubCIF\) from the IUCr](#)  
[Download CIF editor \(enCIFer\) from the CCDC](#)  
[Test a new CIF entry](#)
